# Supplementary material
Source: PubMed Central journal article supplement (PMC4816104)

# Supplementary Figure 1

**a**

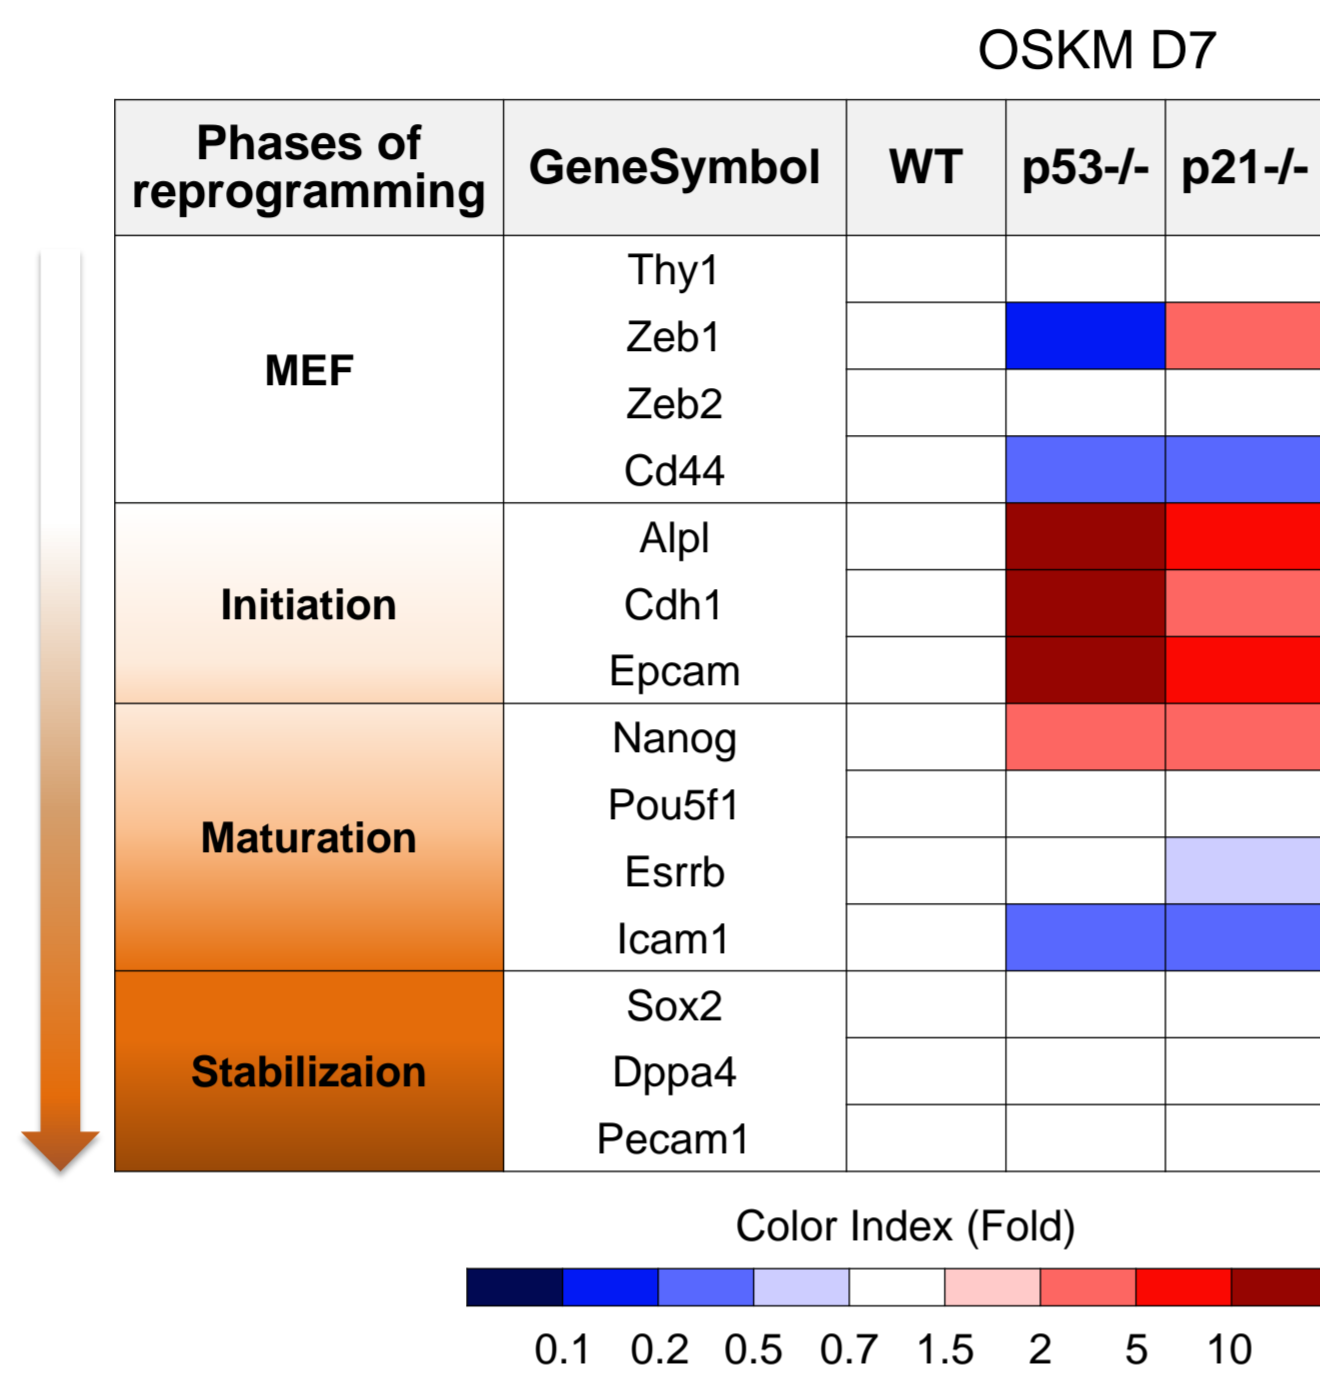

**b**

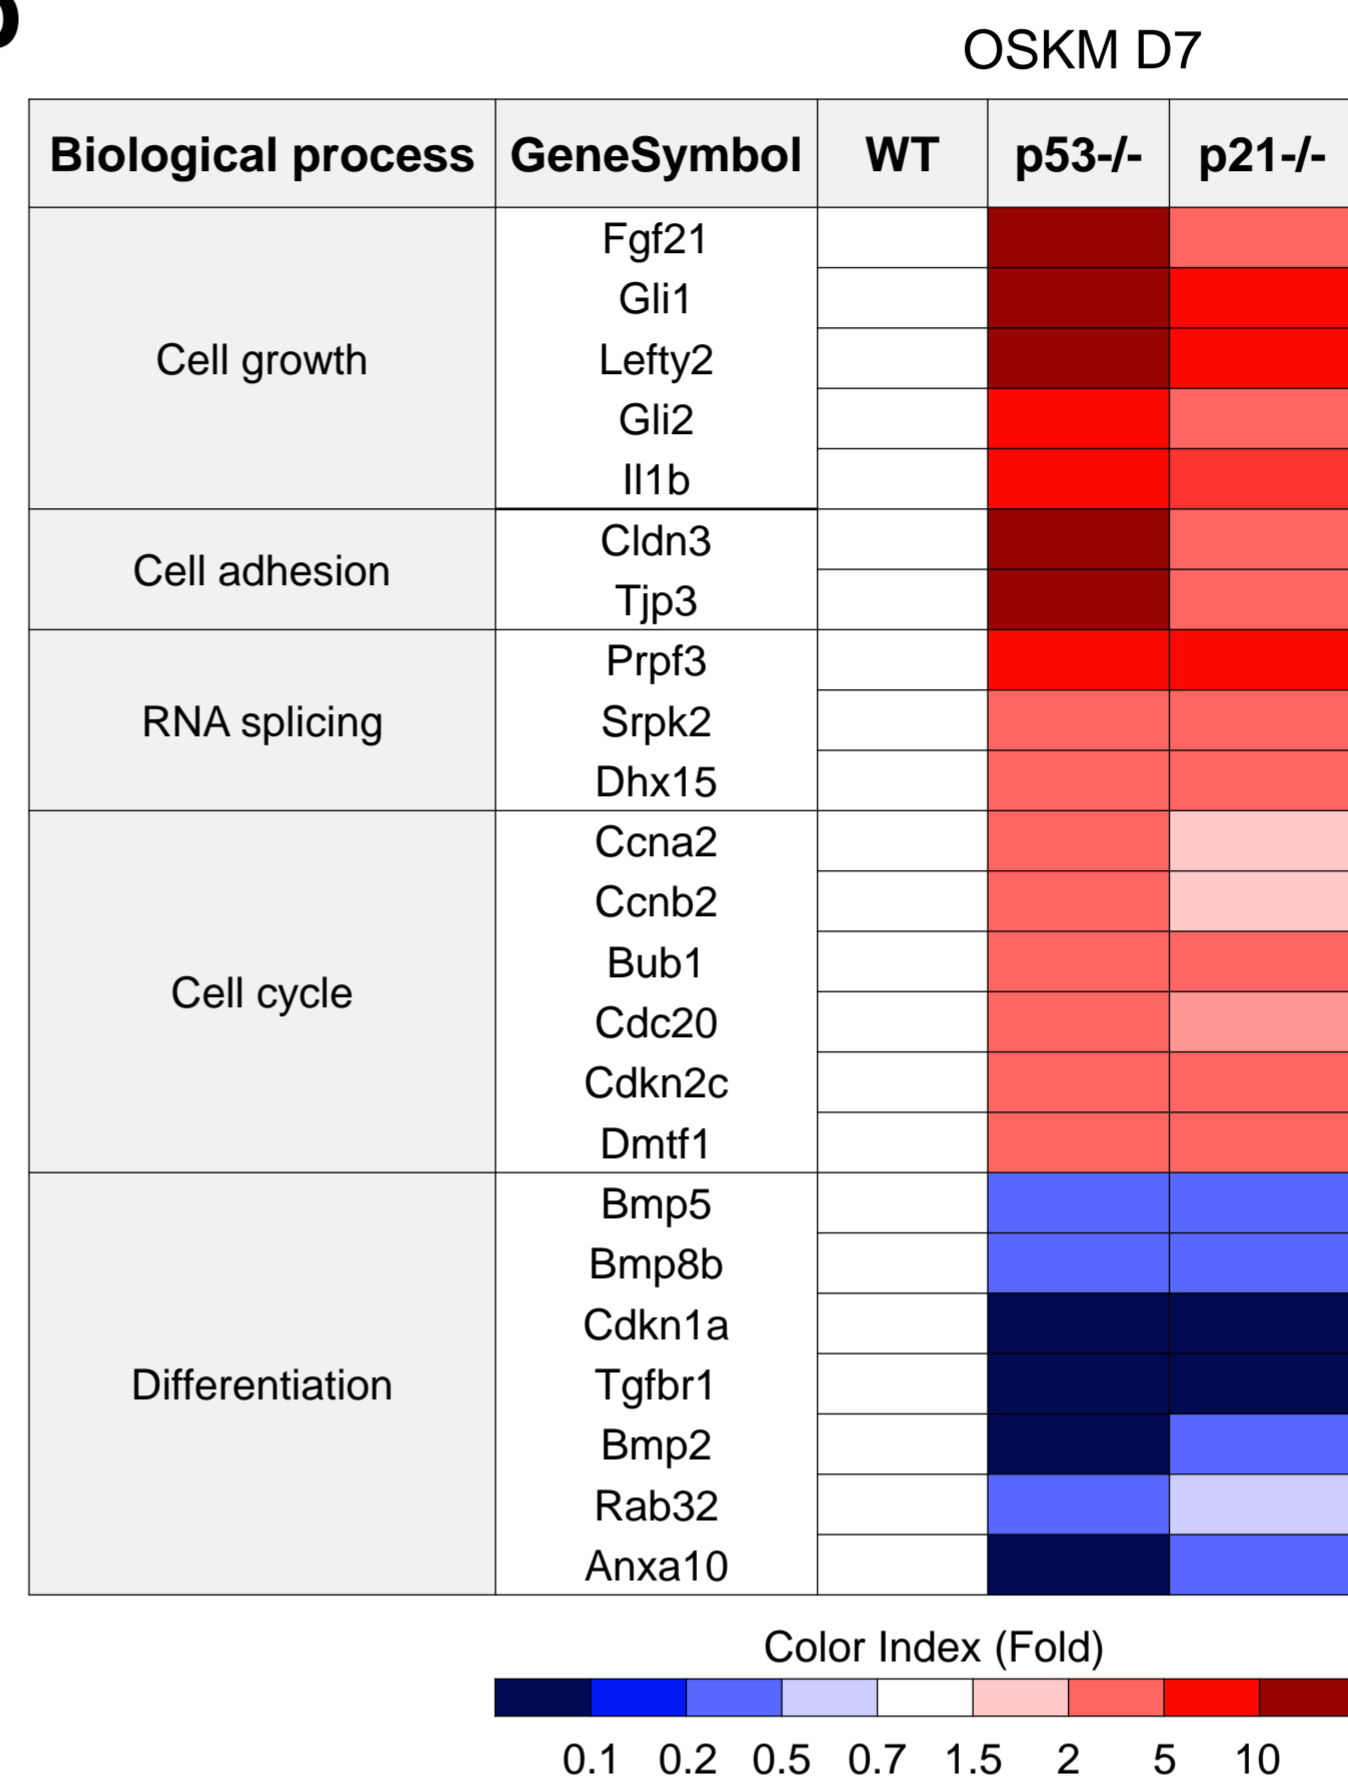

**c**

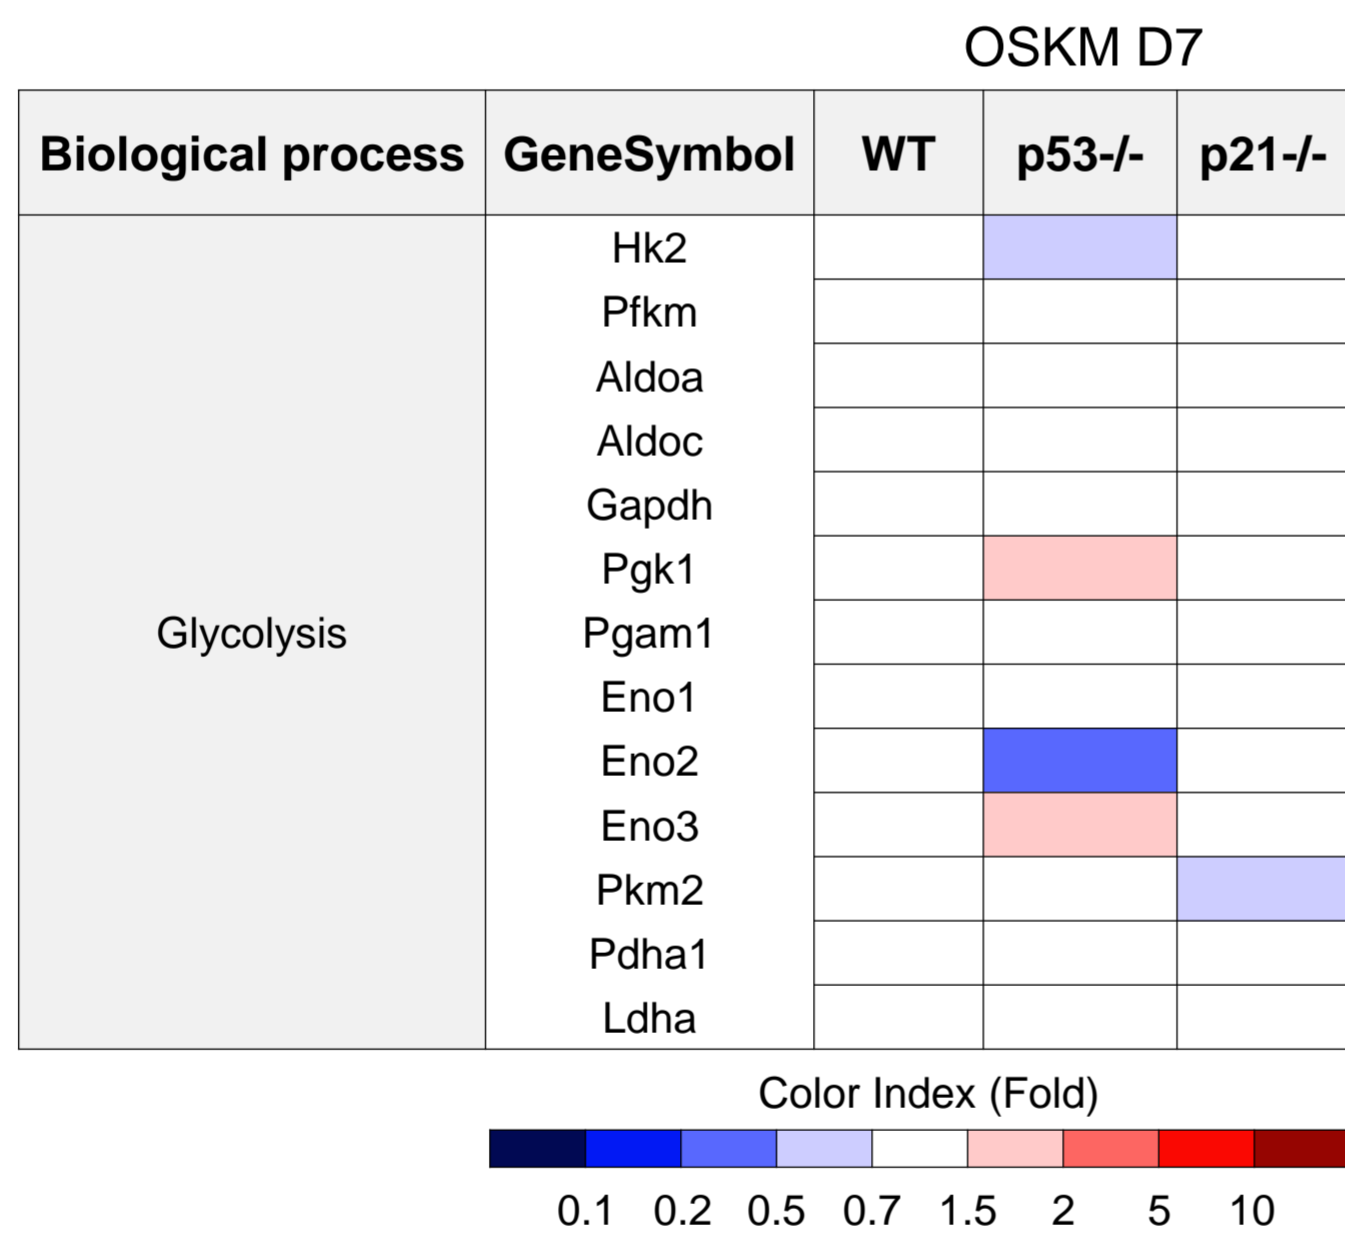

## Supplementary Figure 2

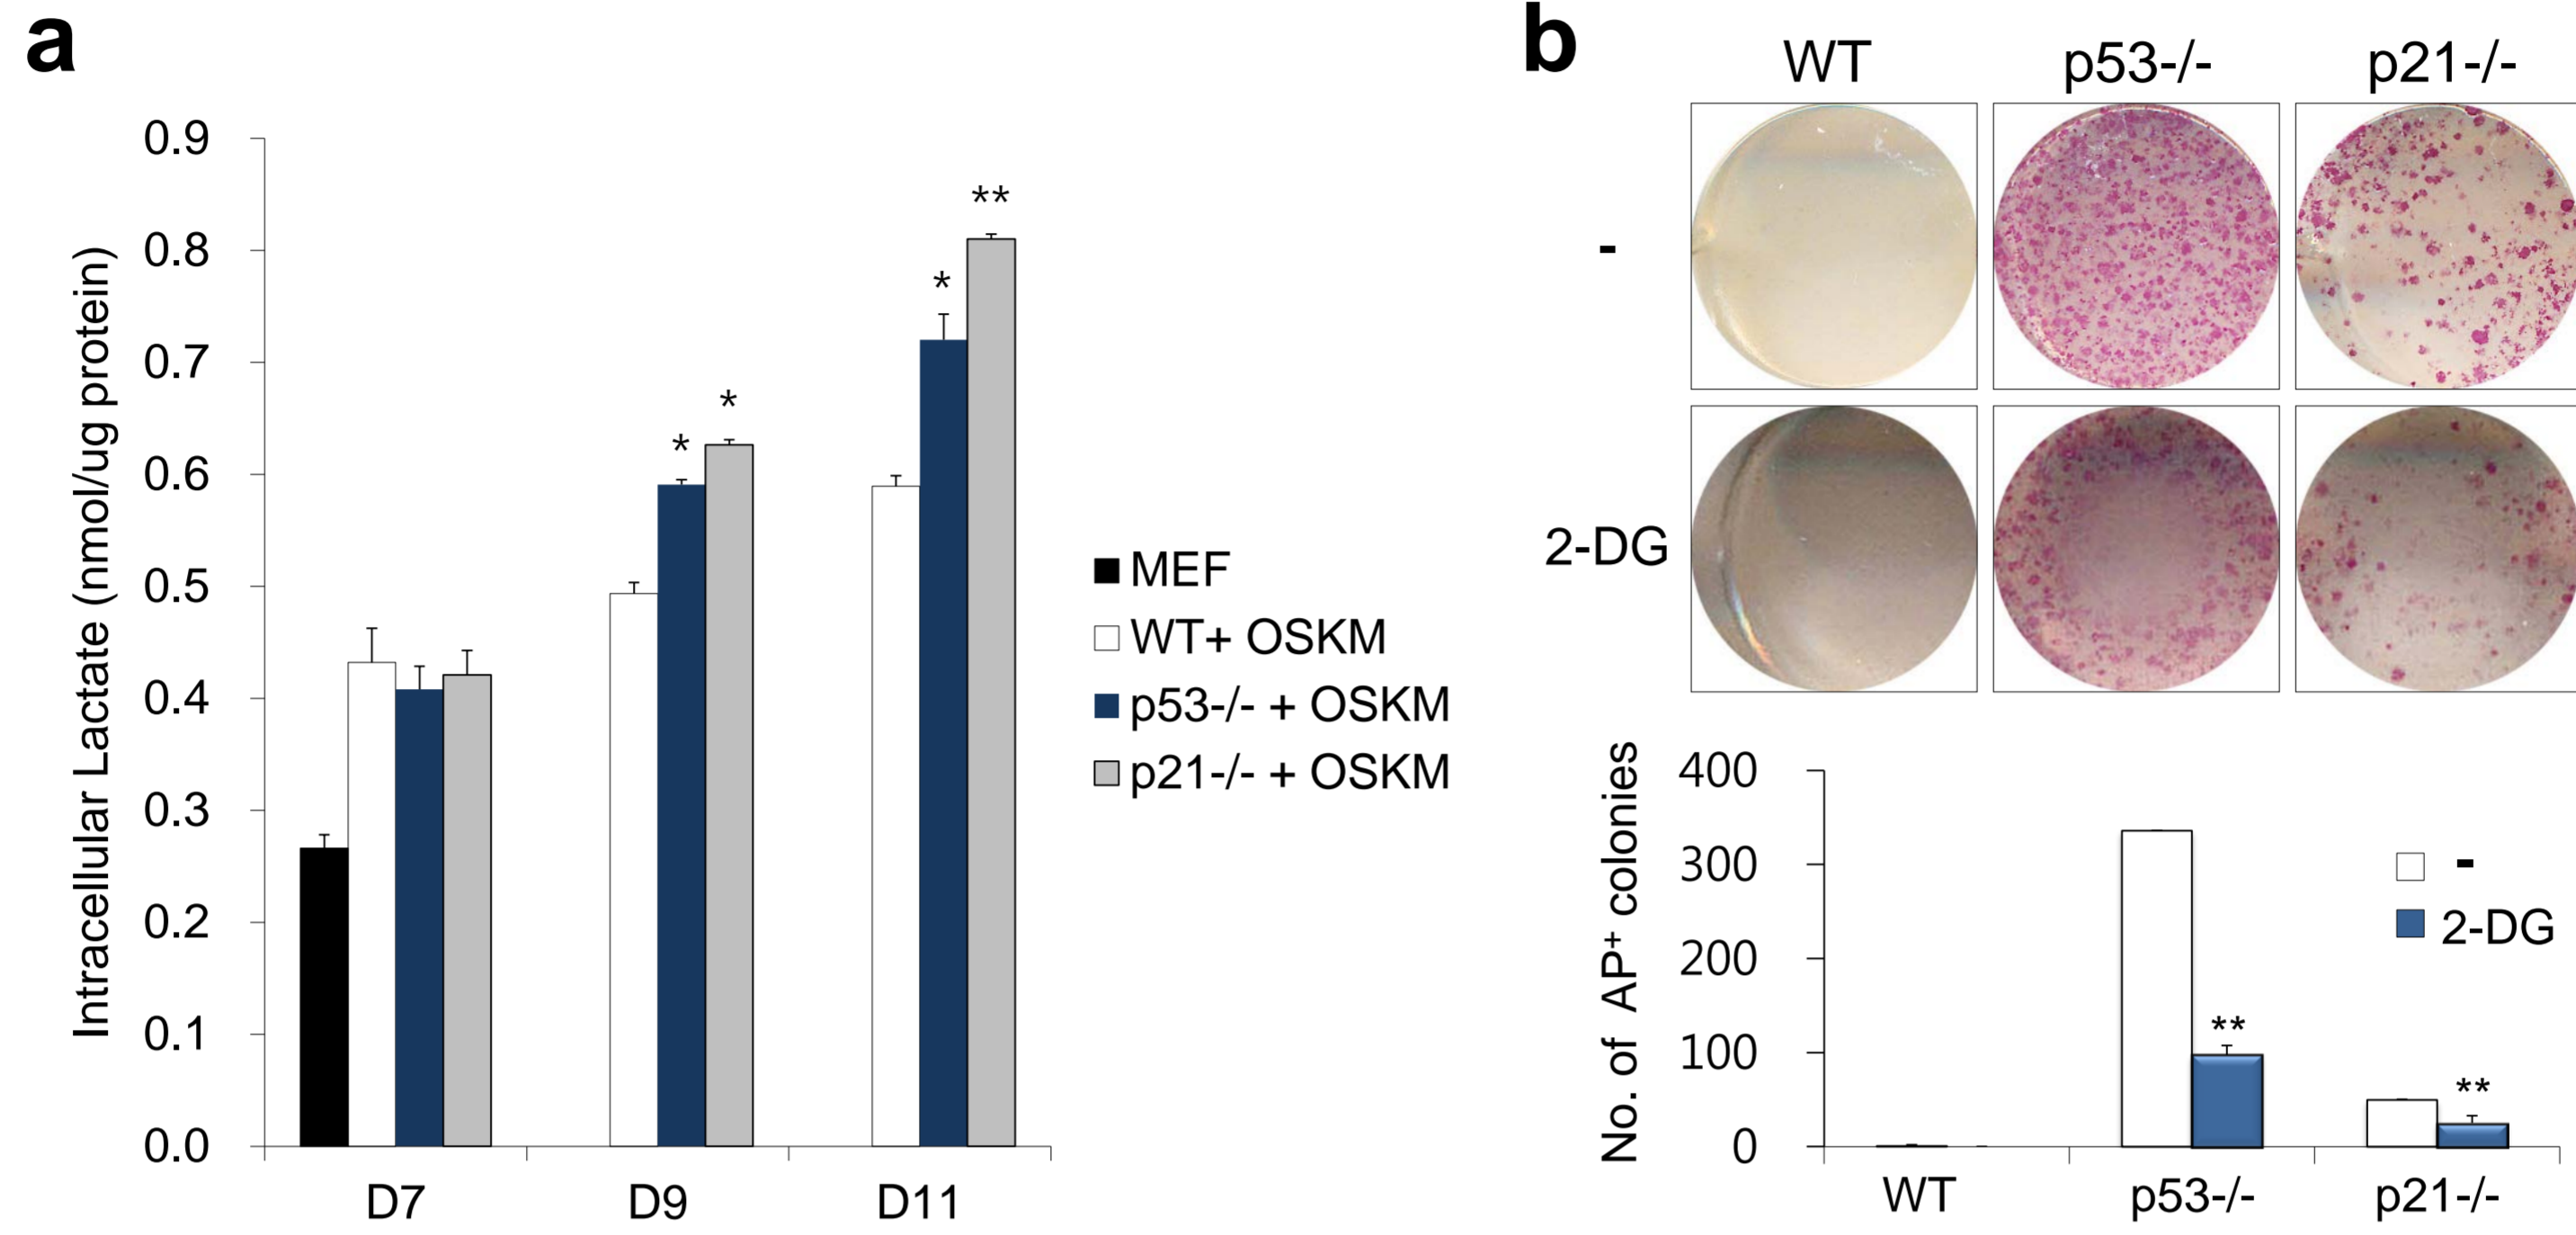

# Supplementary Figure 3

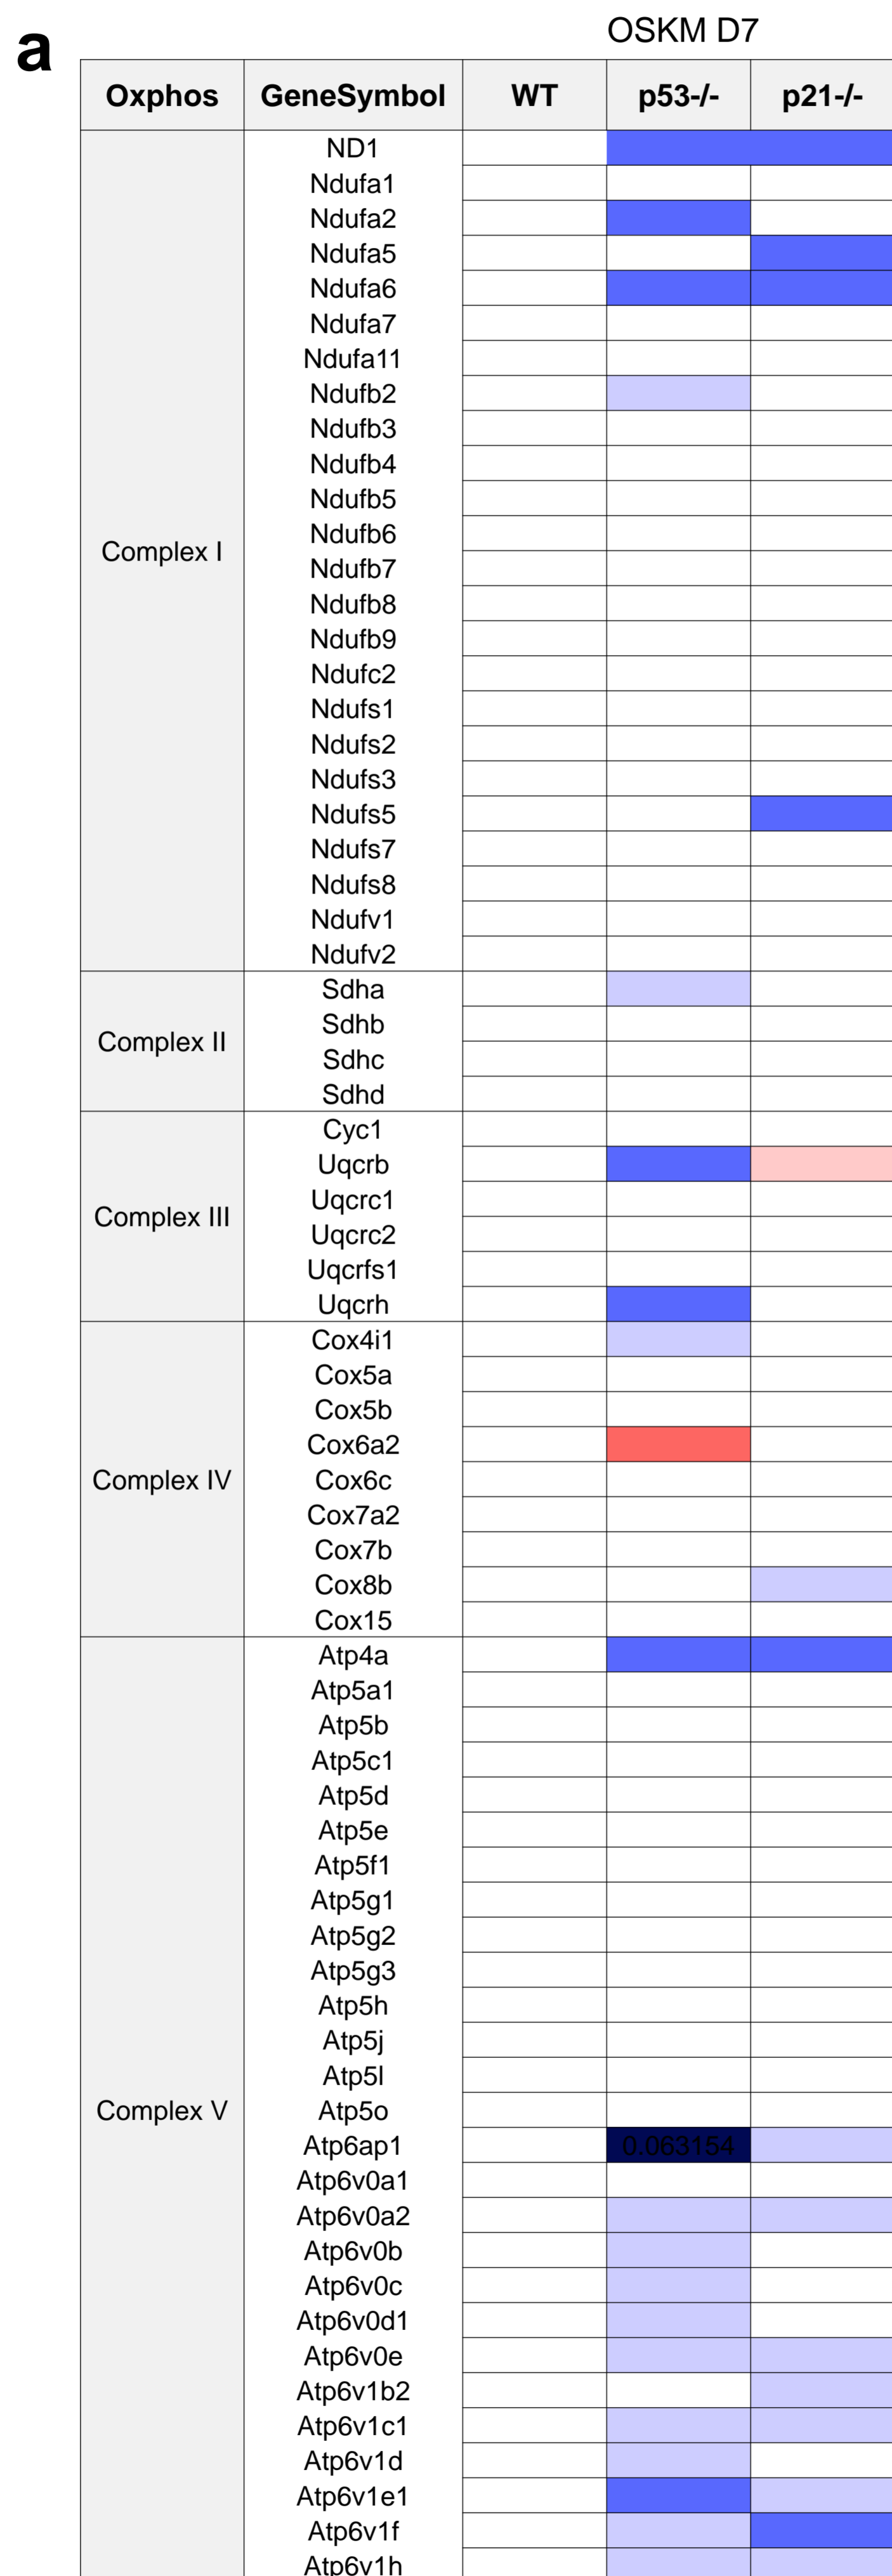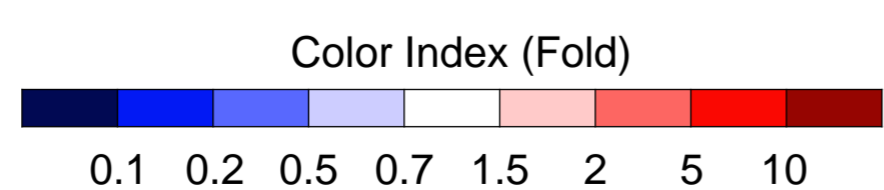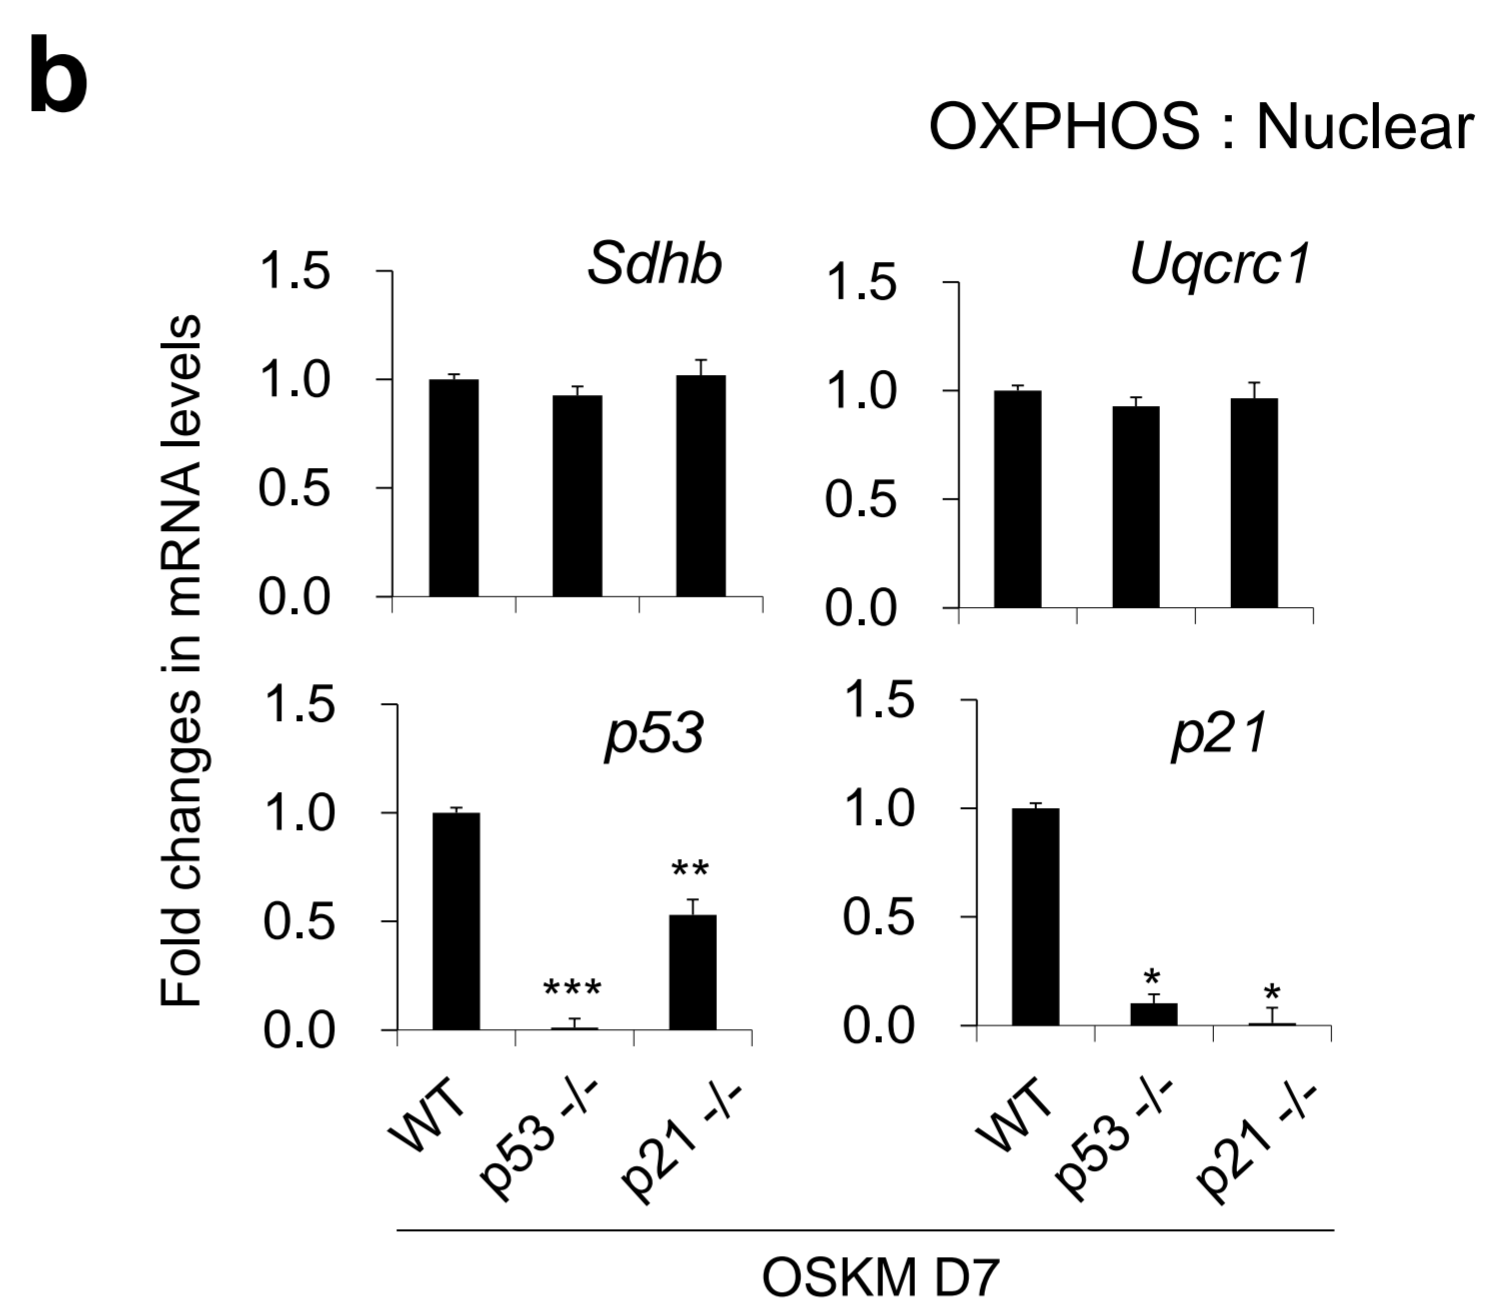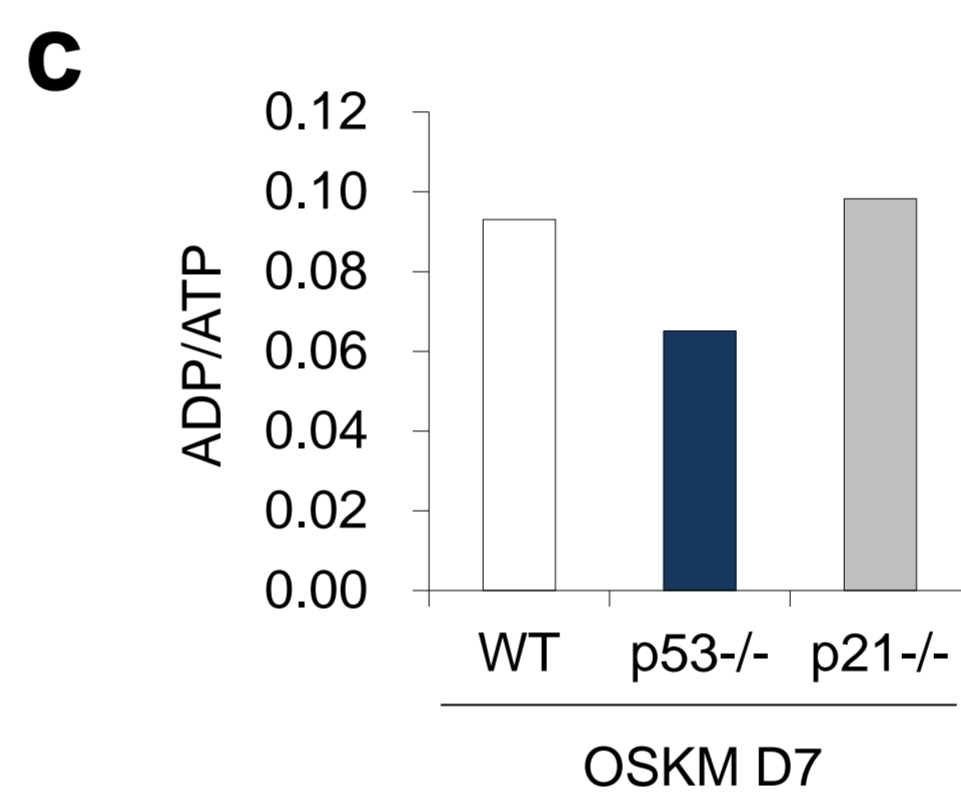

## Supplementary Figure 4

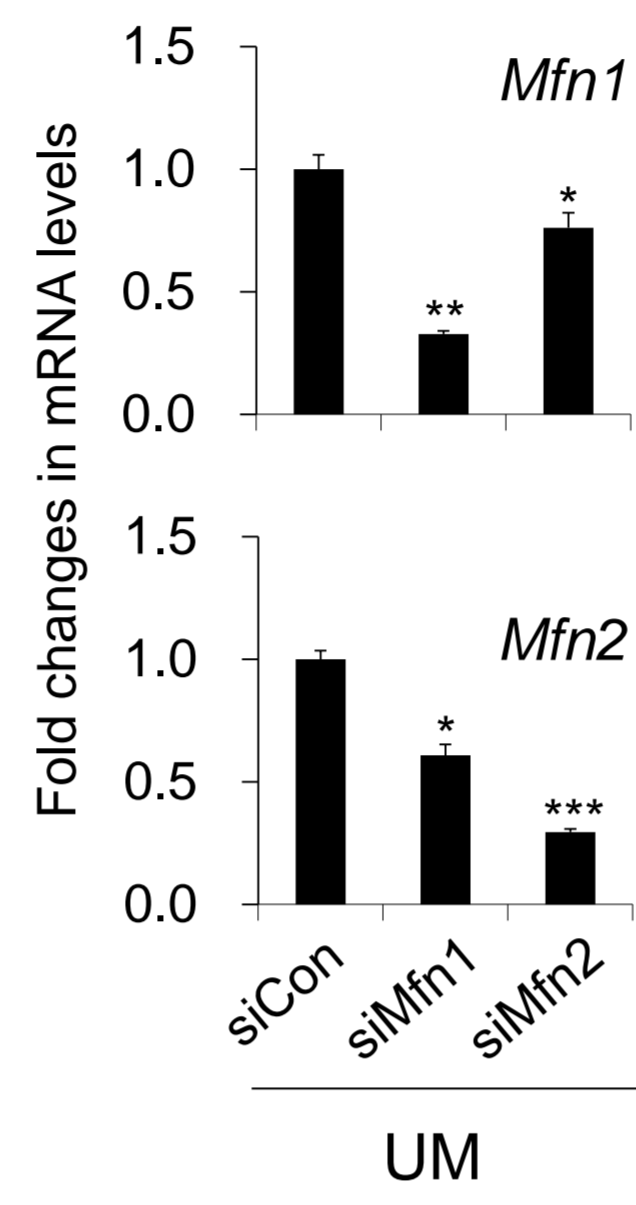

# Supplementary Figure 5

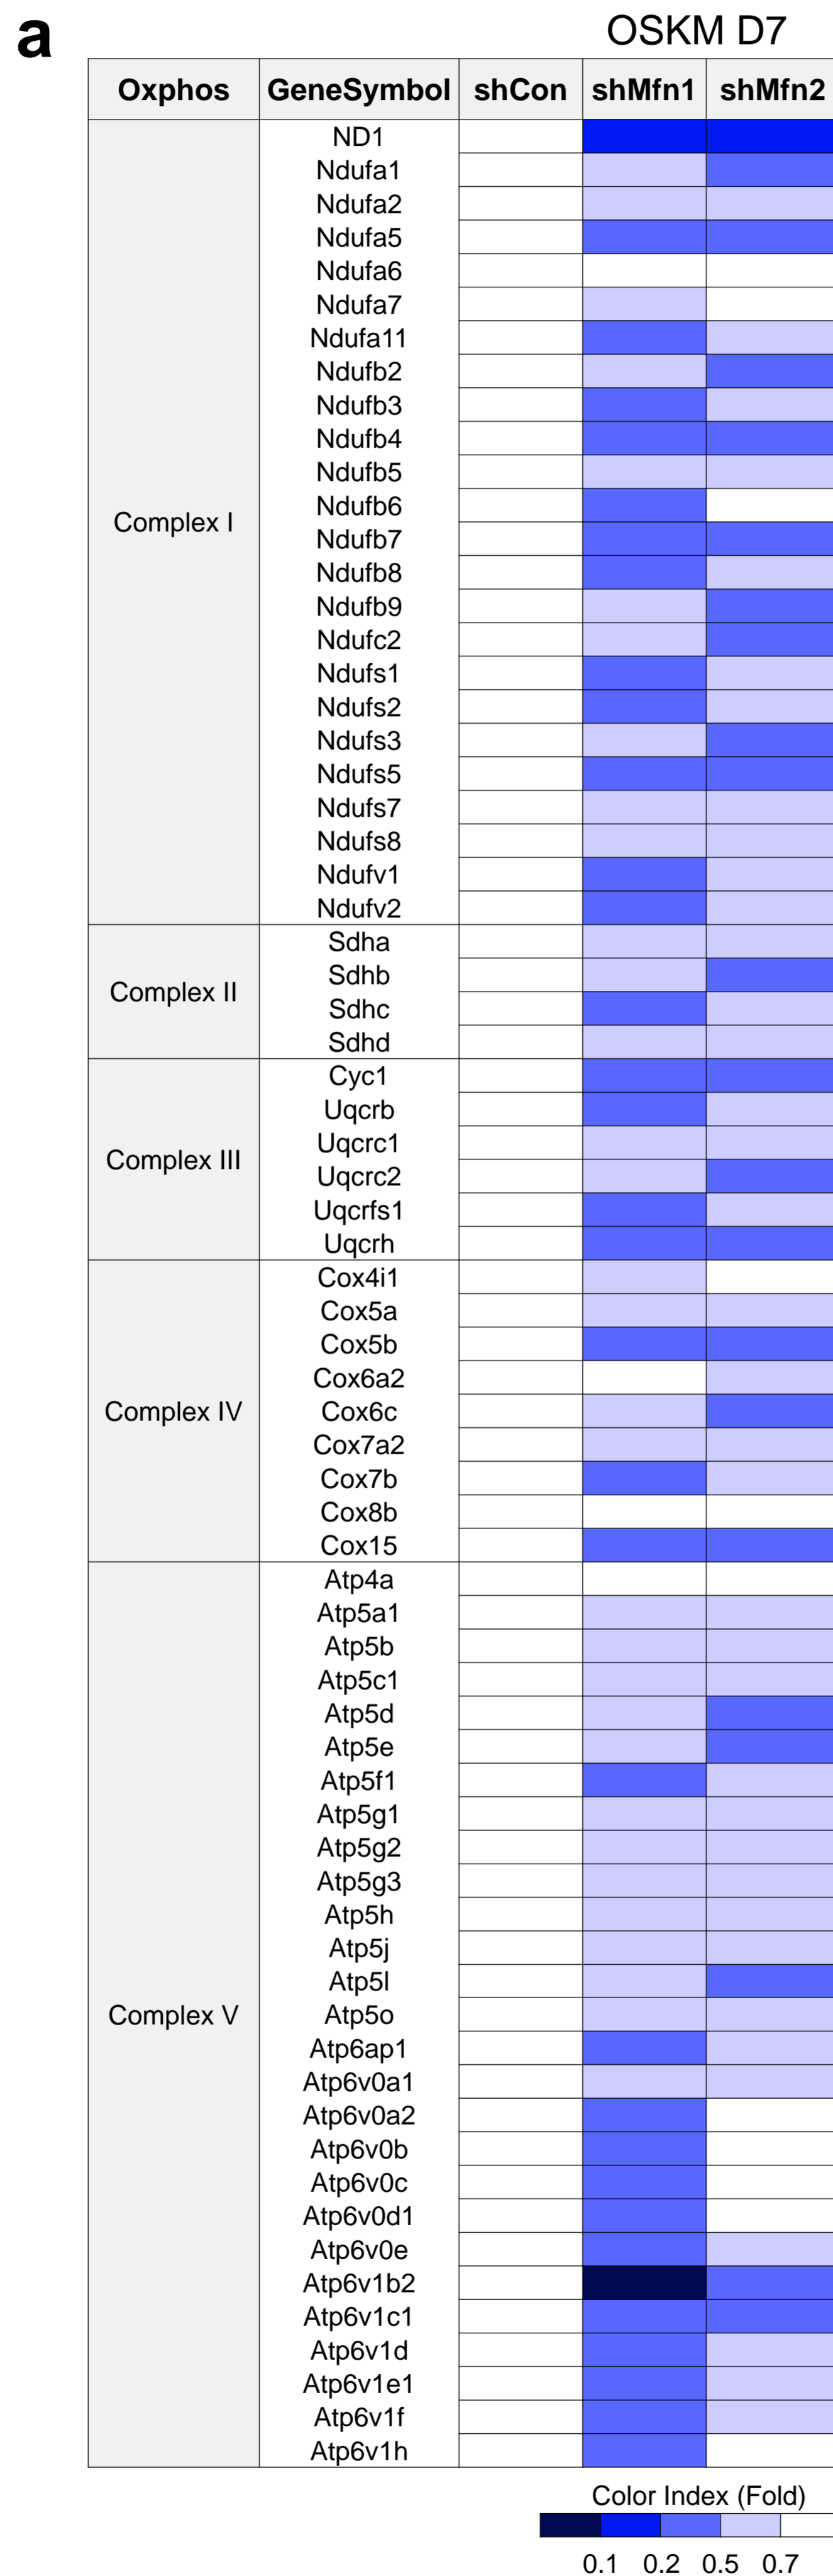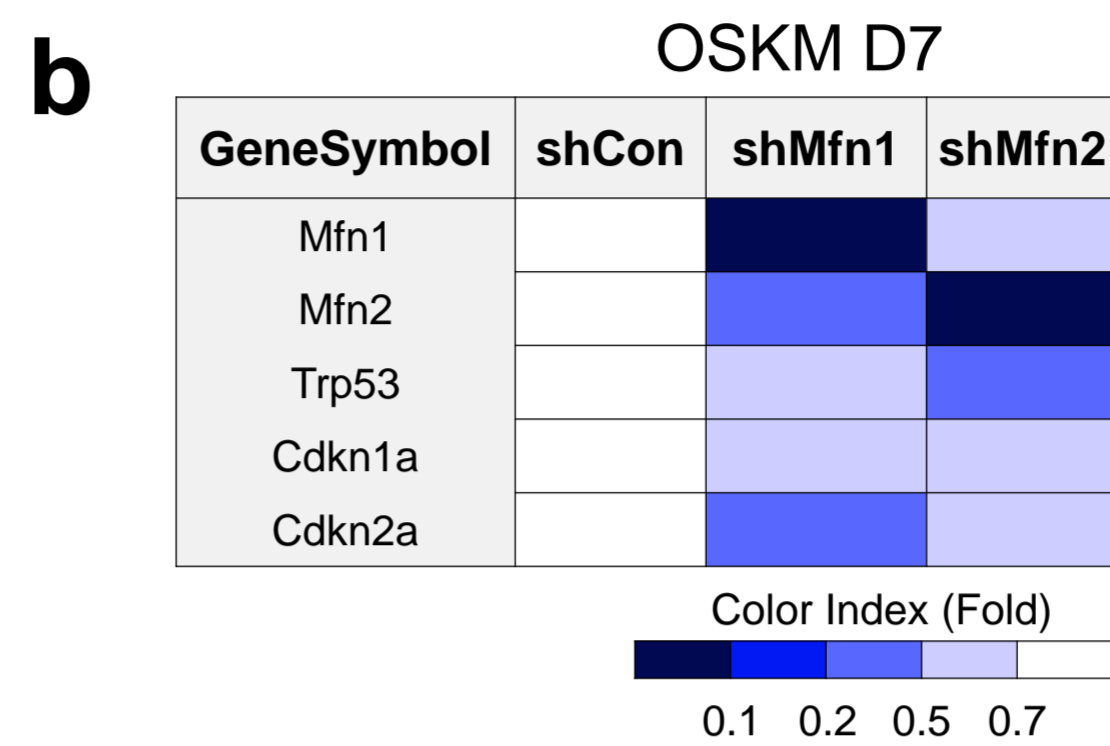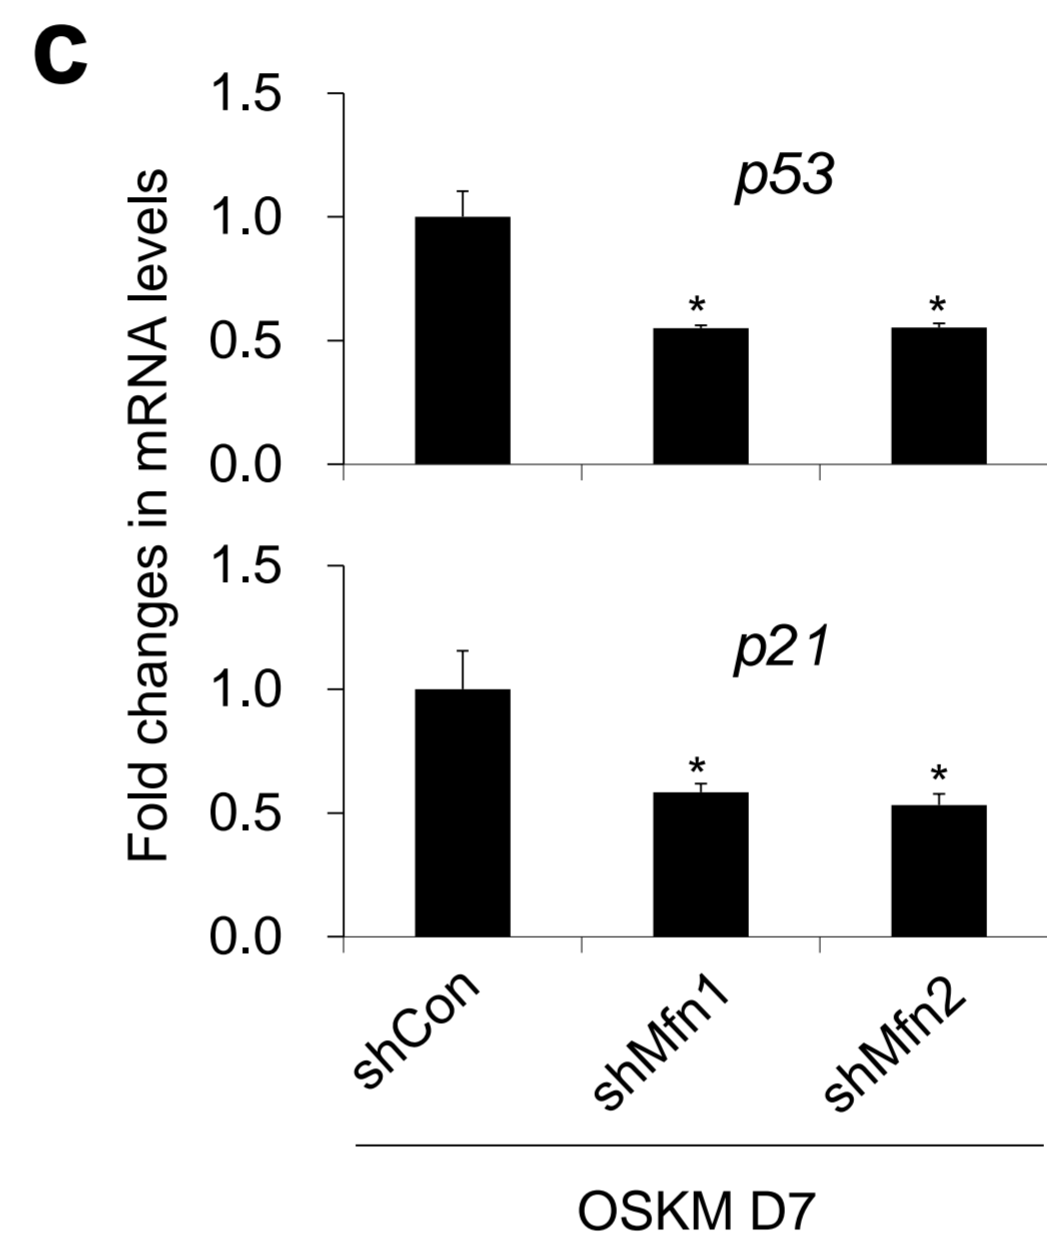

## Supplementary Figure 6

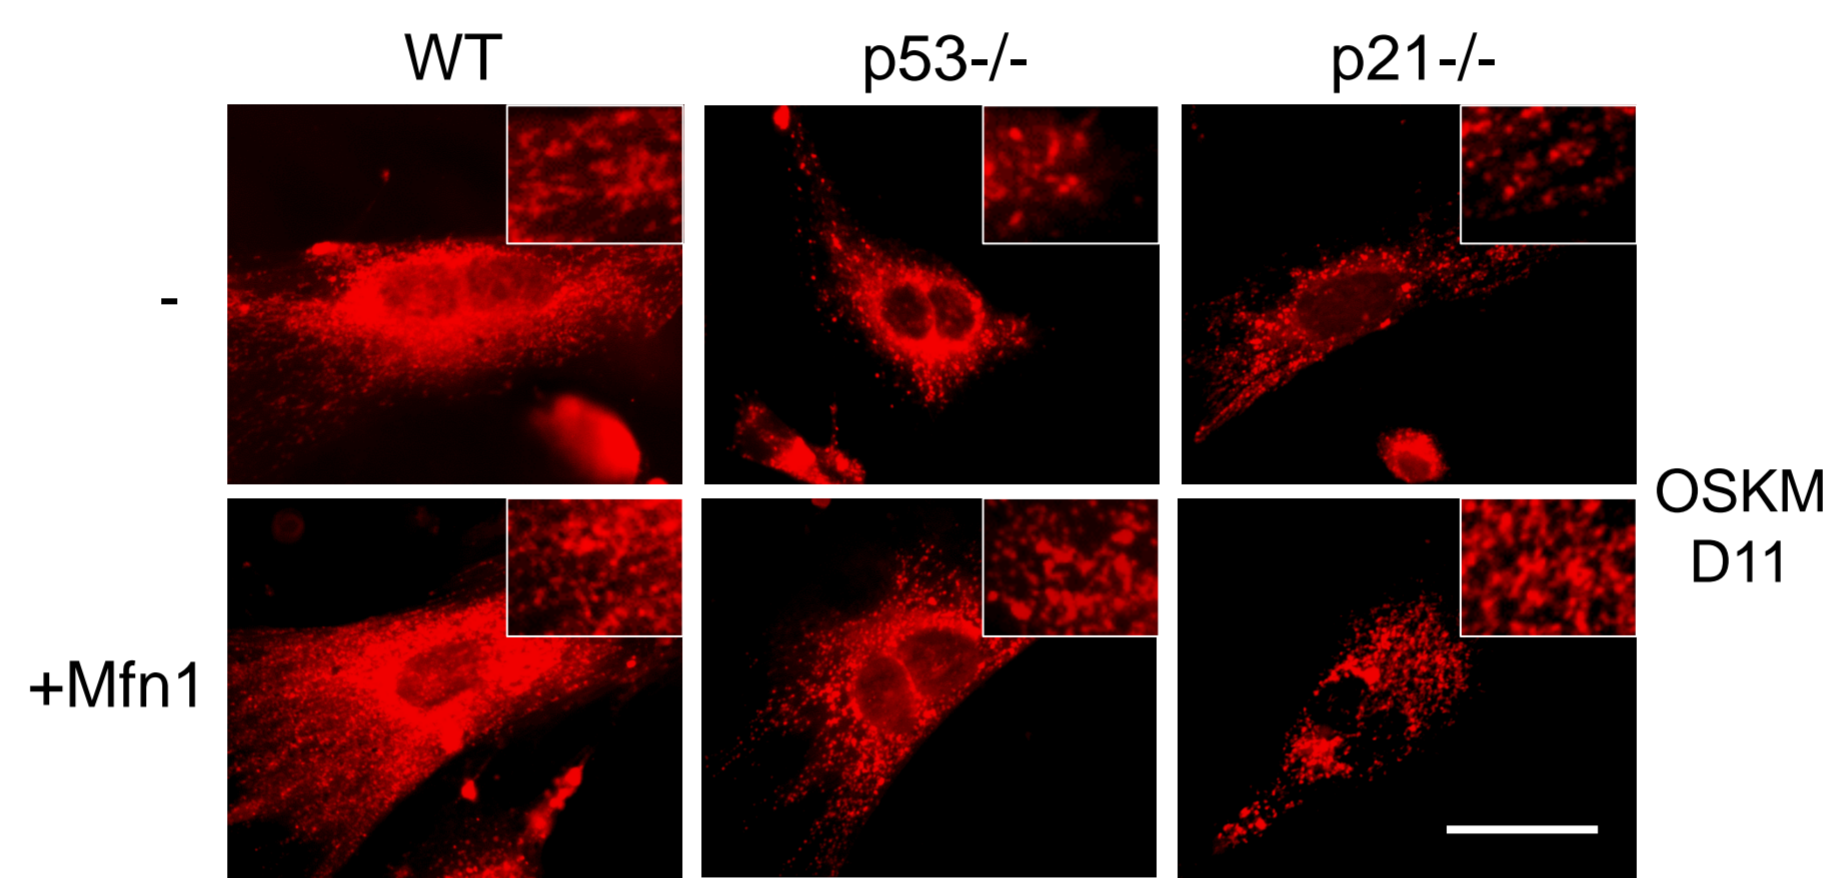



# Supplementary Figure 7

**a**

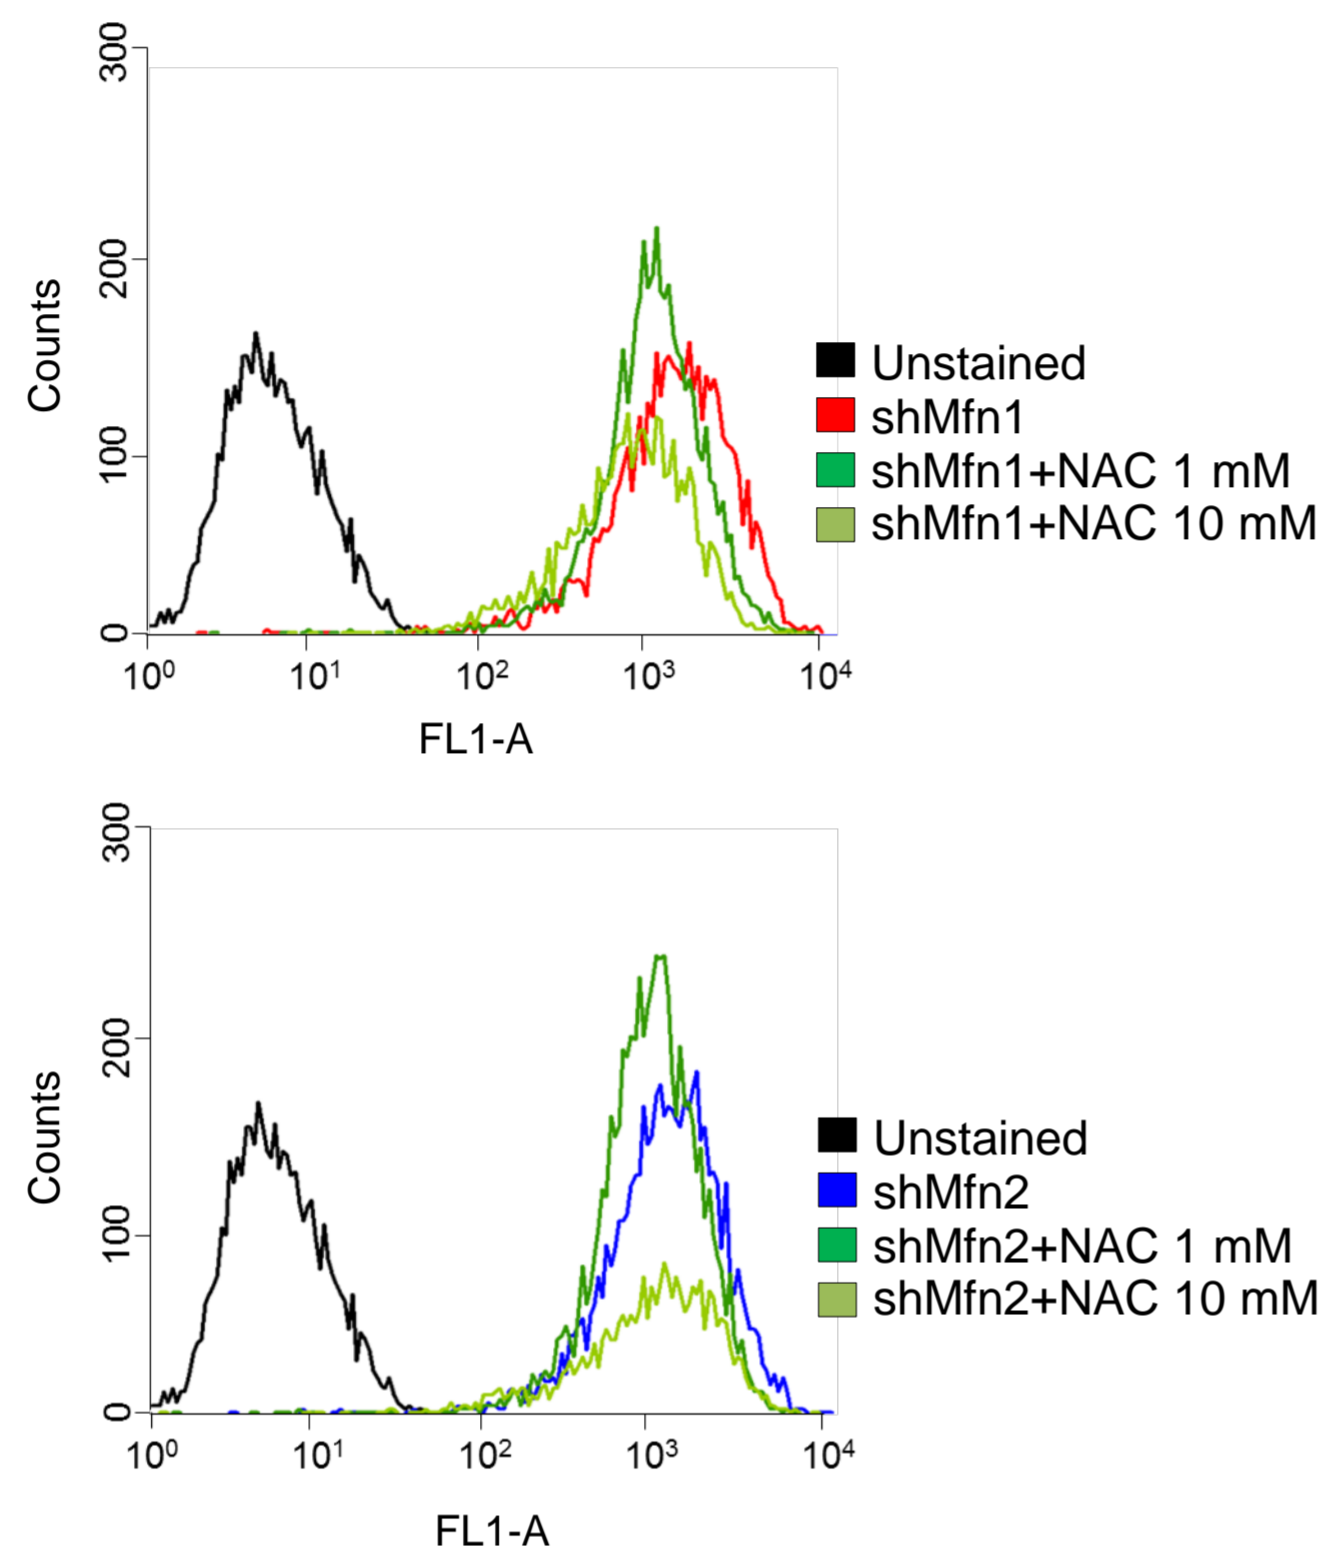

**b**

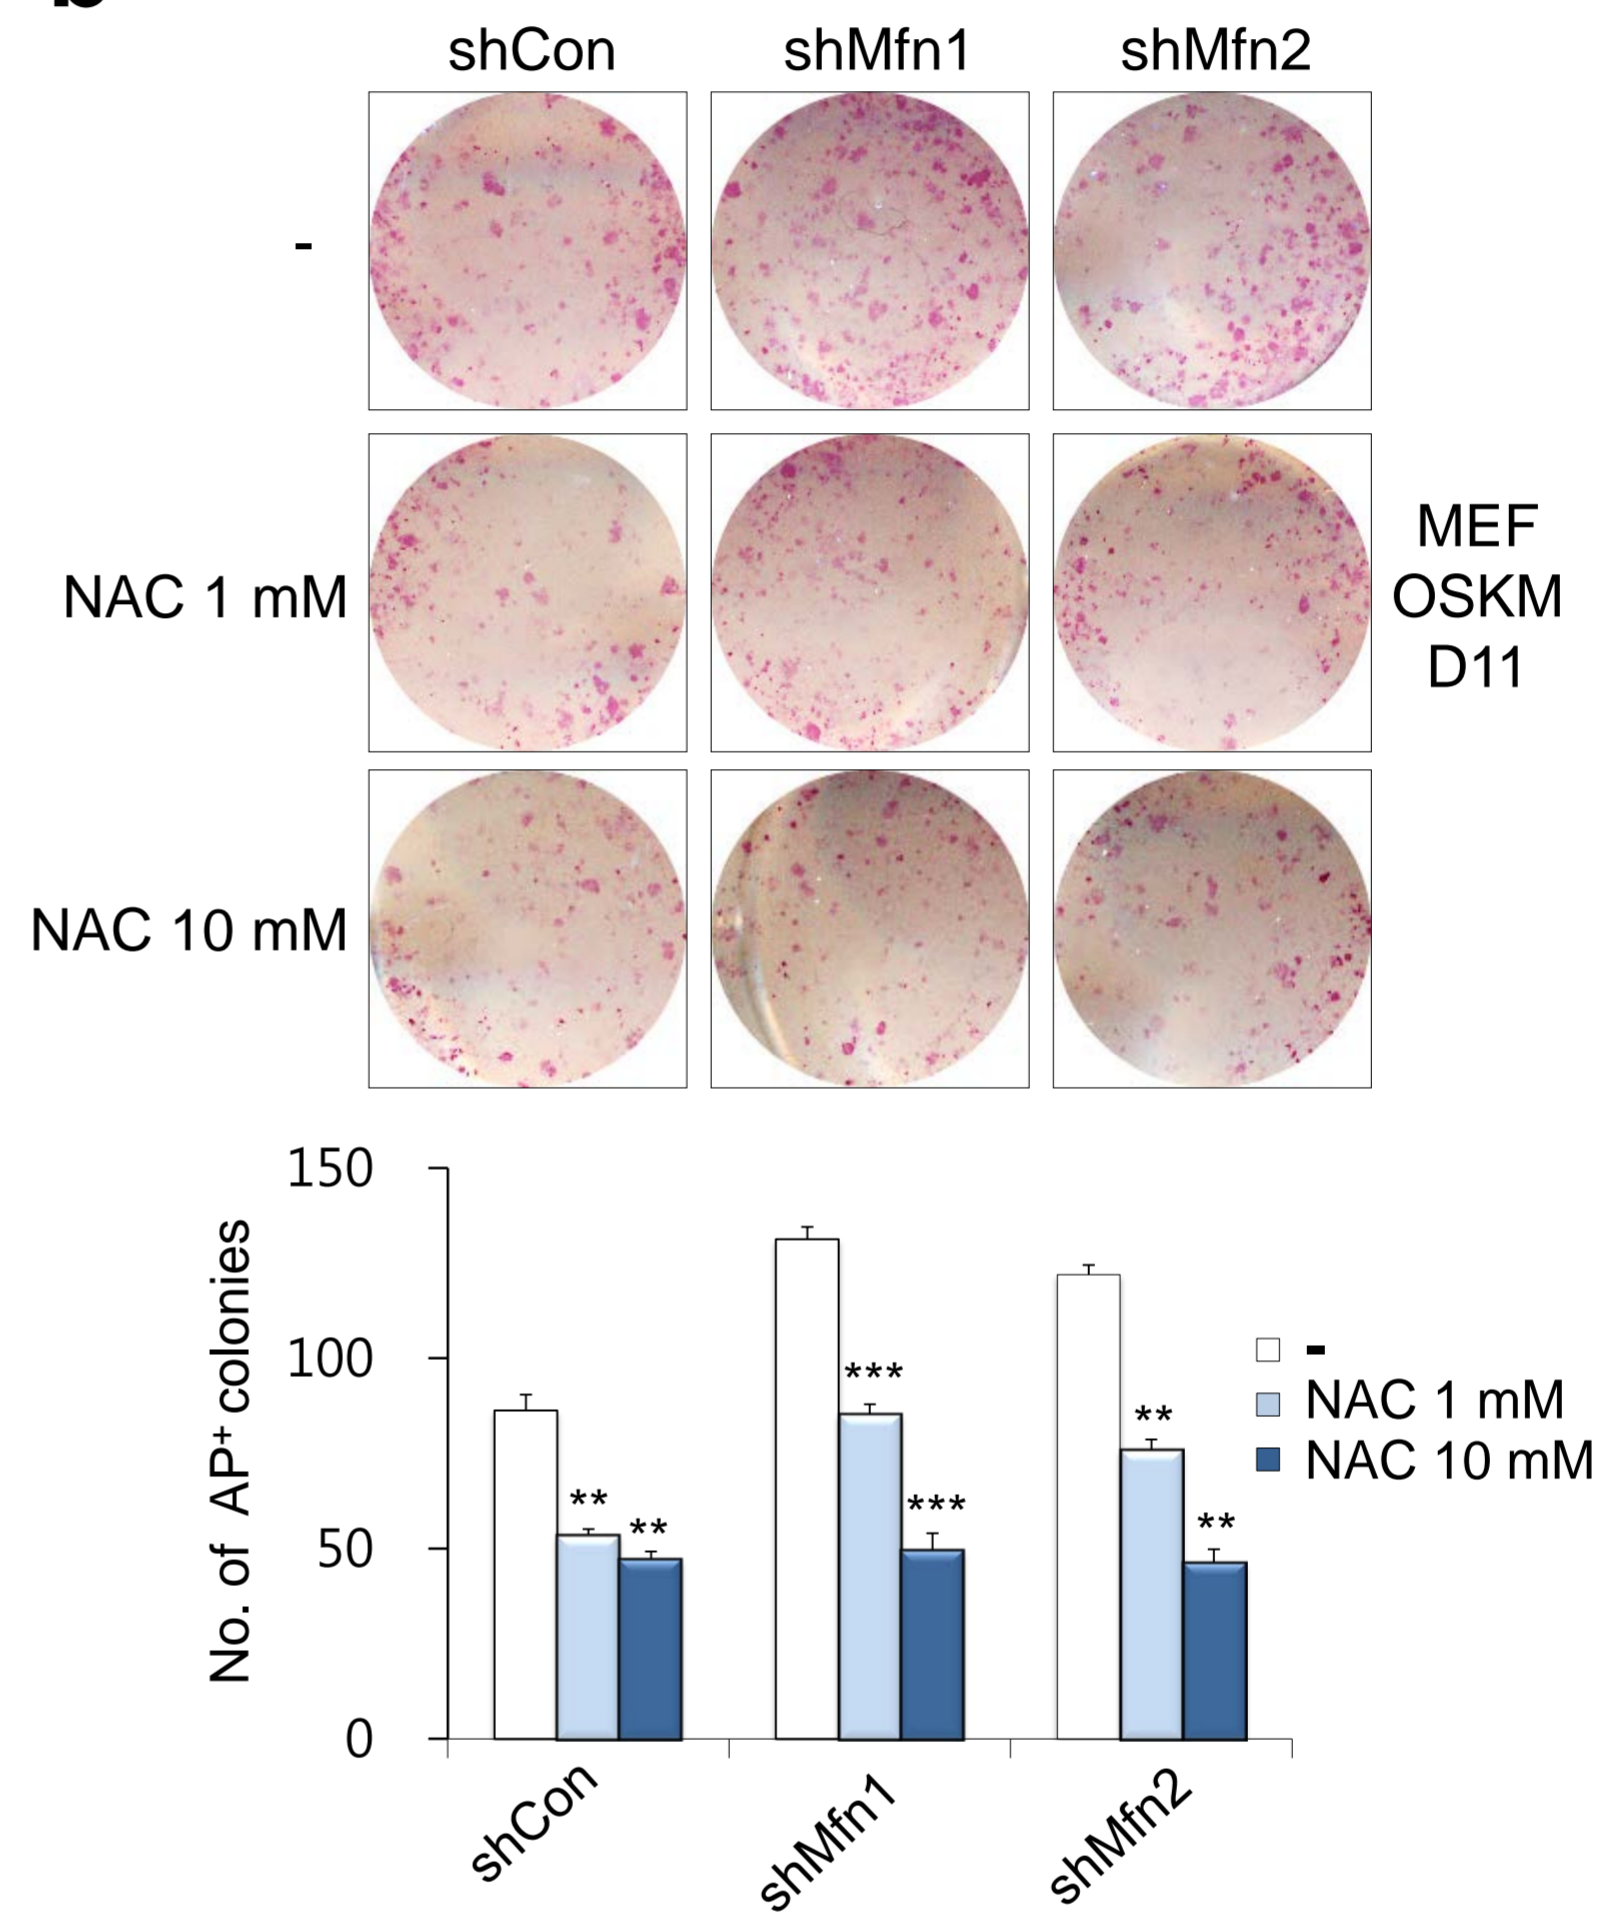

# Supplementary Figure 8

**a**

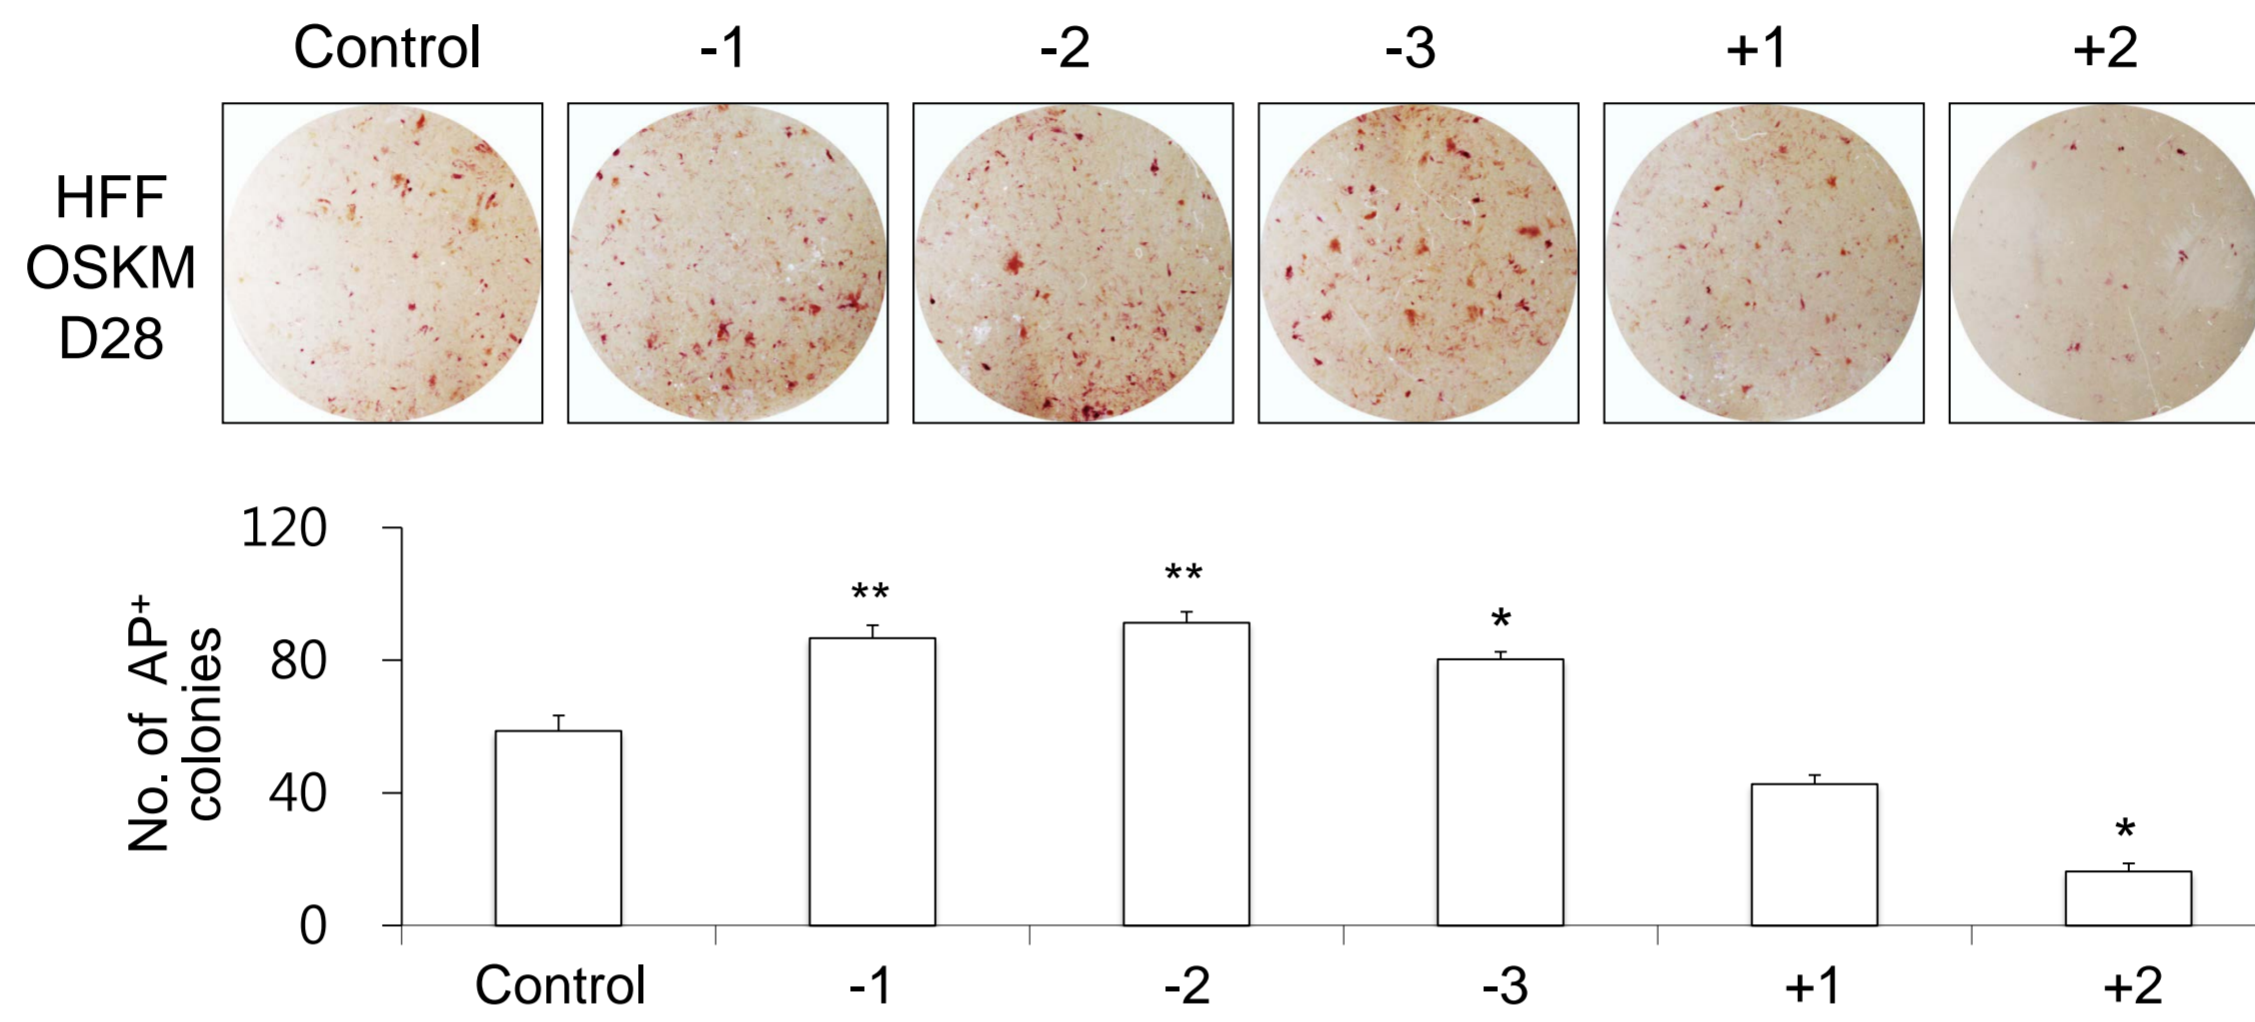

**b**

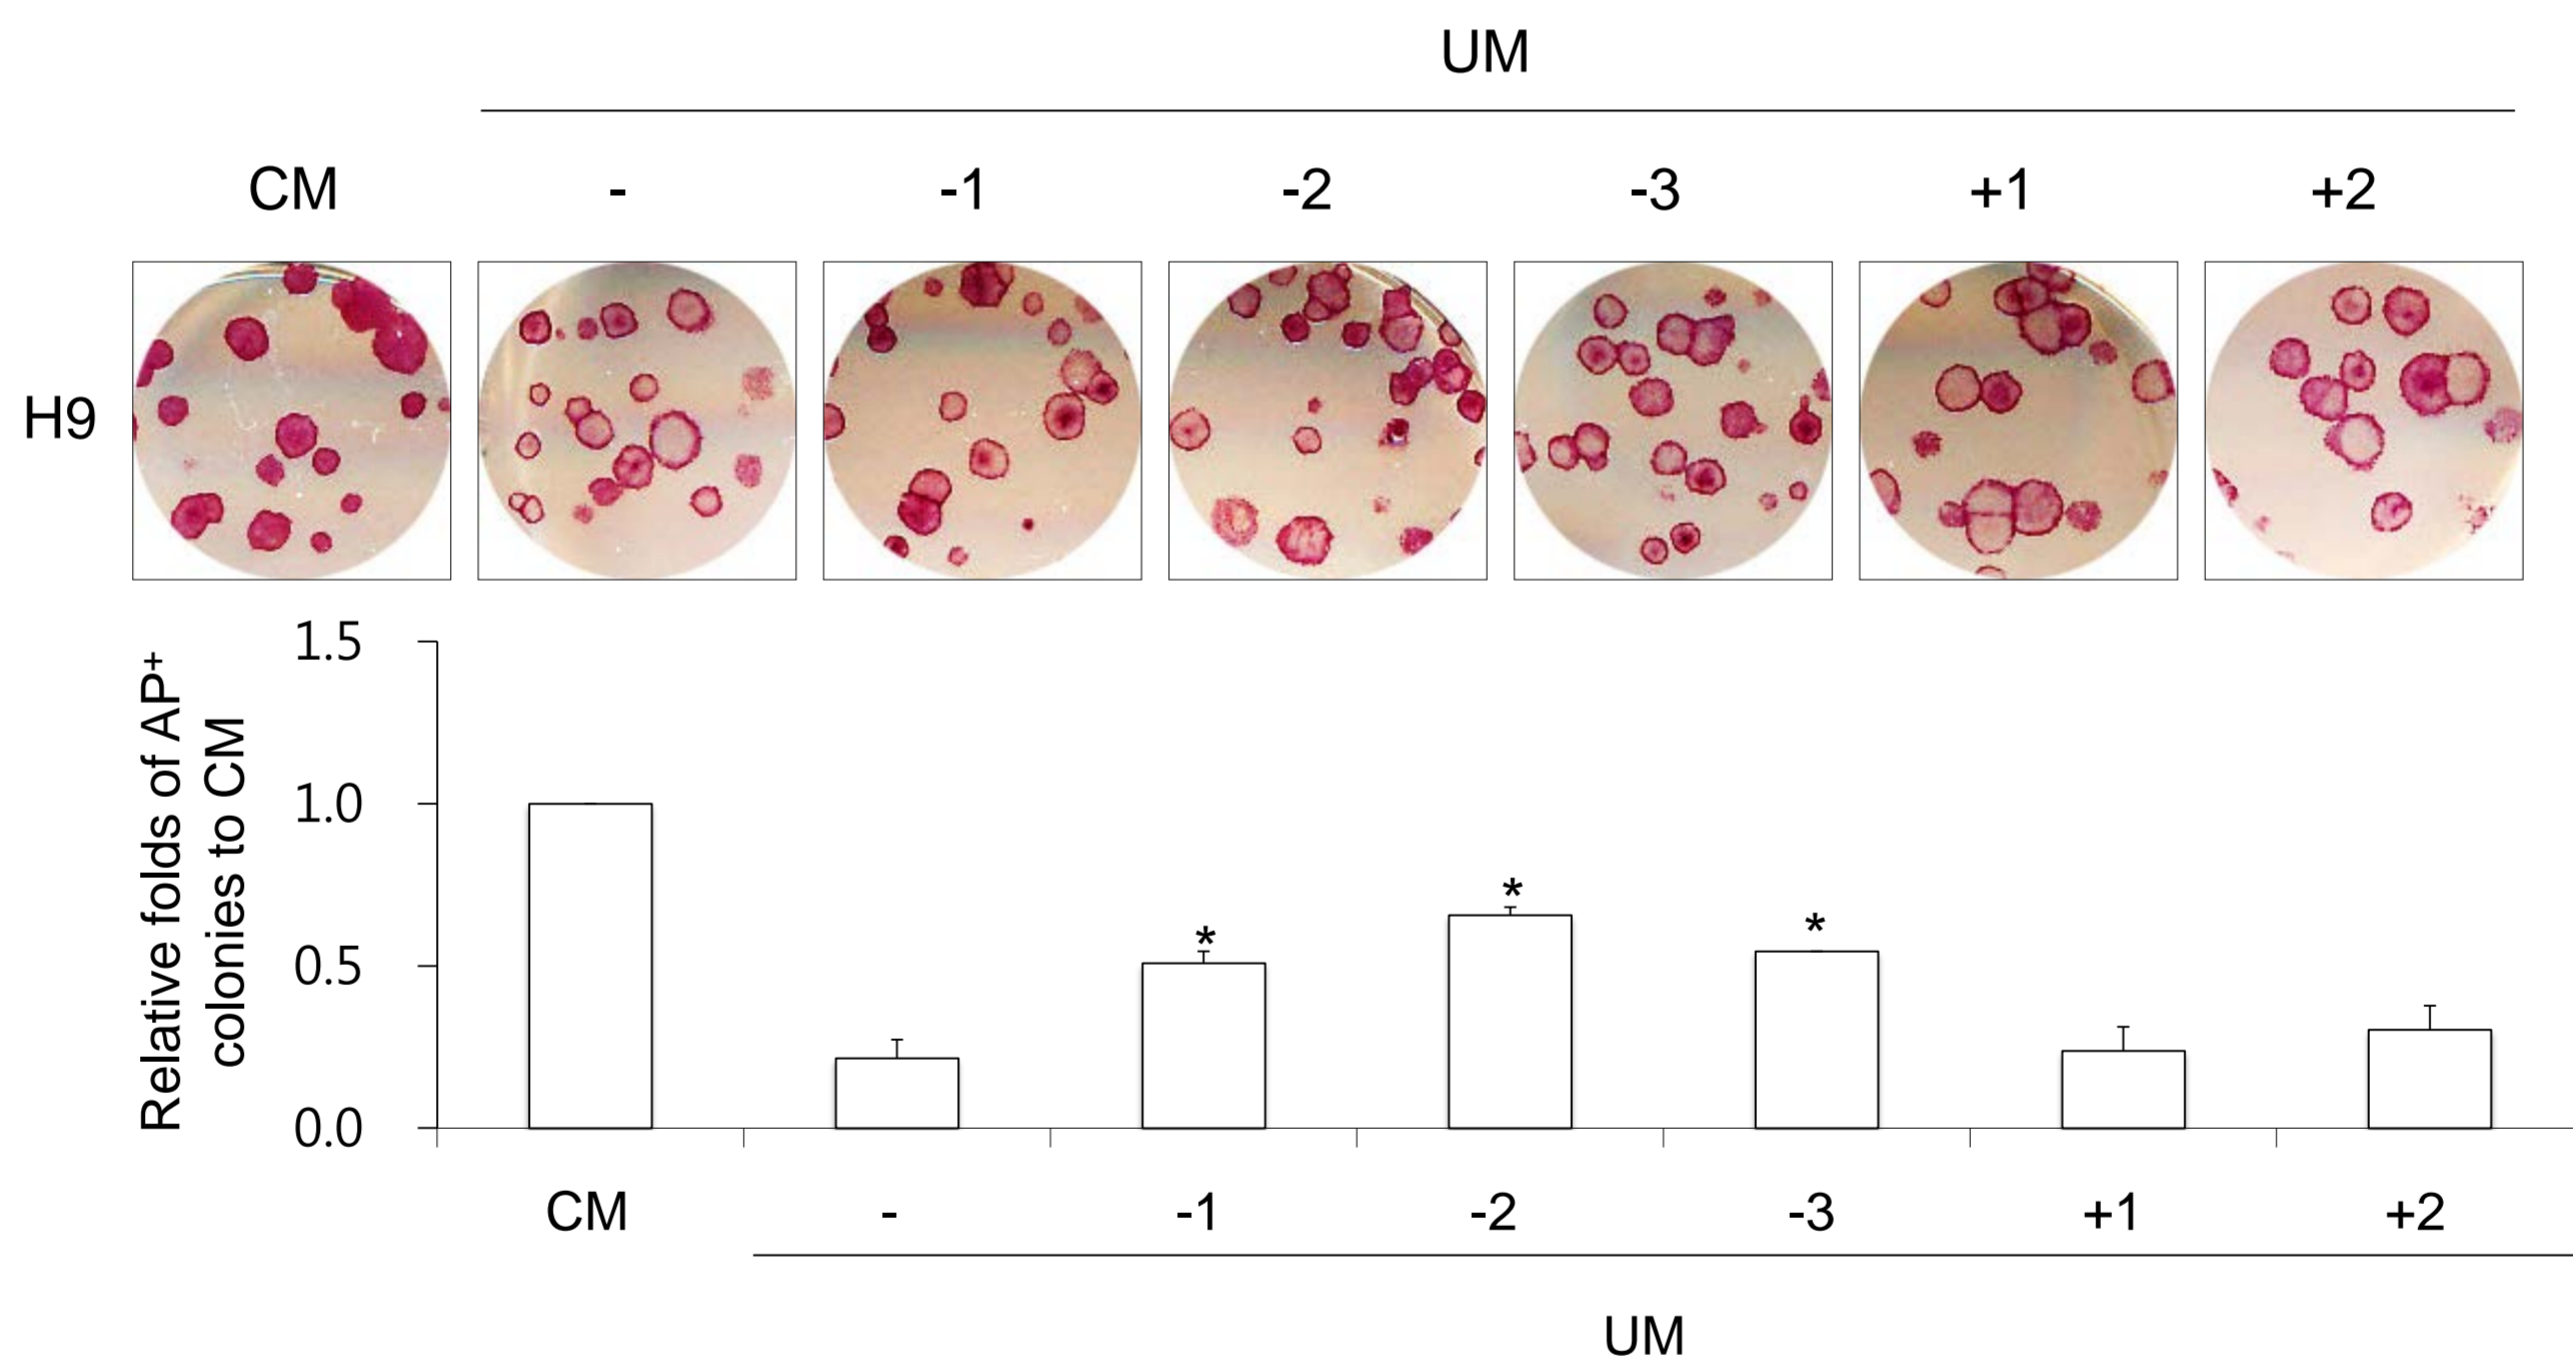



# Supplementary Figure 9

**a**

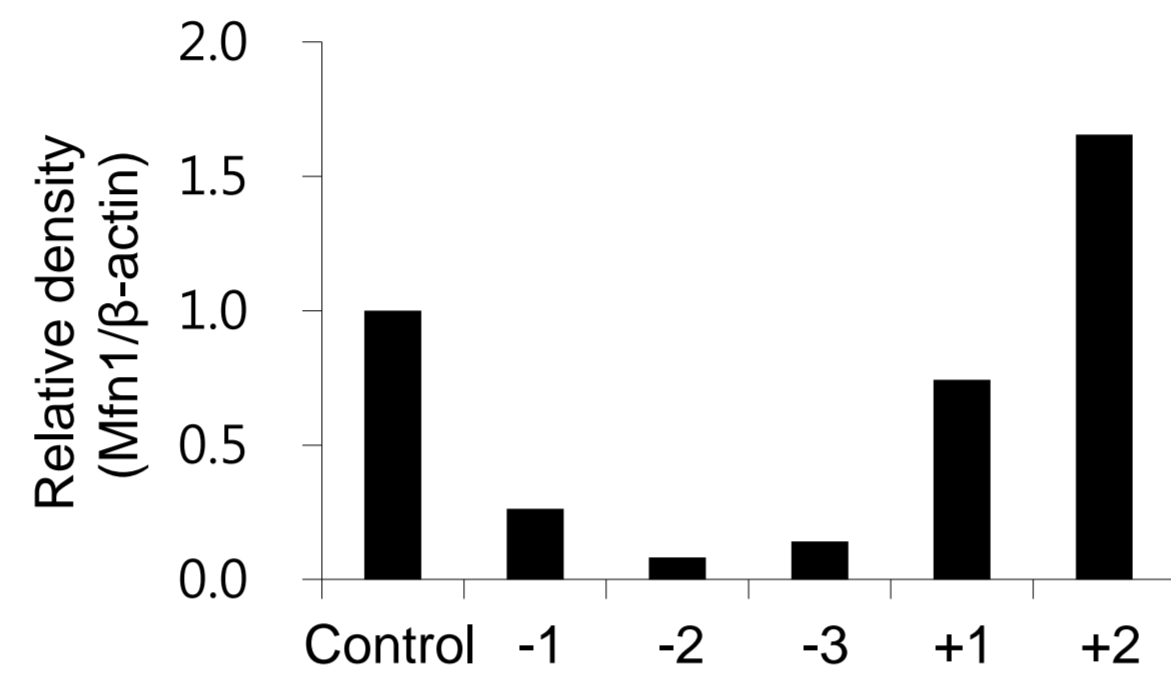

**b**

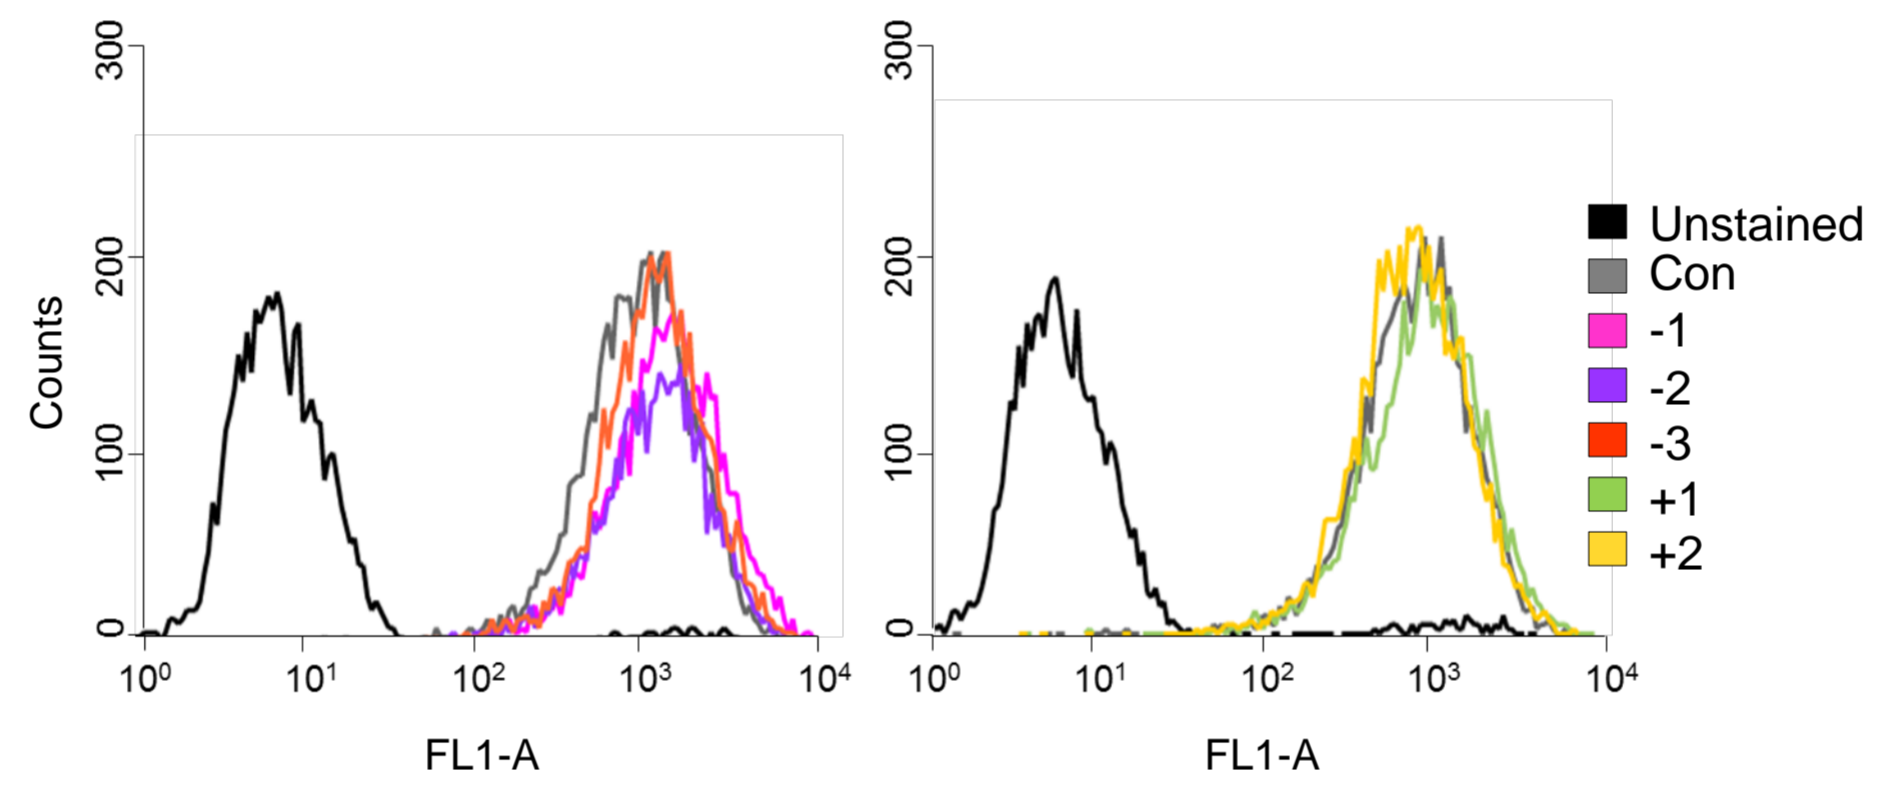

Supplement: cdd201543x2.pdf [file cdd201543x2.pdf]
